# Supplementary material for: Real world evidence of calcifediol use and mortality rate of COVID-19 hospitalized in a large cohort of 16,401 Andalusian patients
Source: bioRxiv or medRxiv preprint supplement (doi:10.1101/2021.04.27.21255937), 2021-04-29
Supplement: Supplementary file [file media-3.pdf]

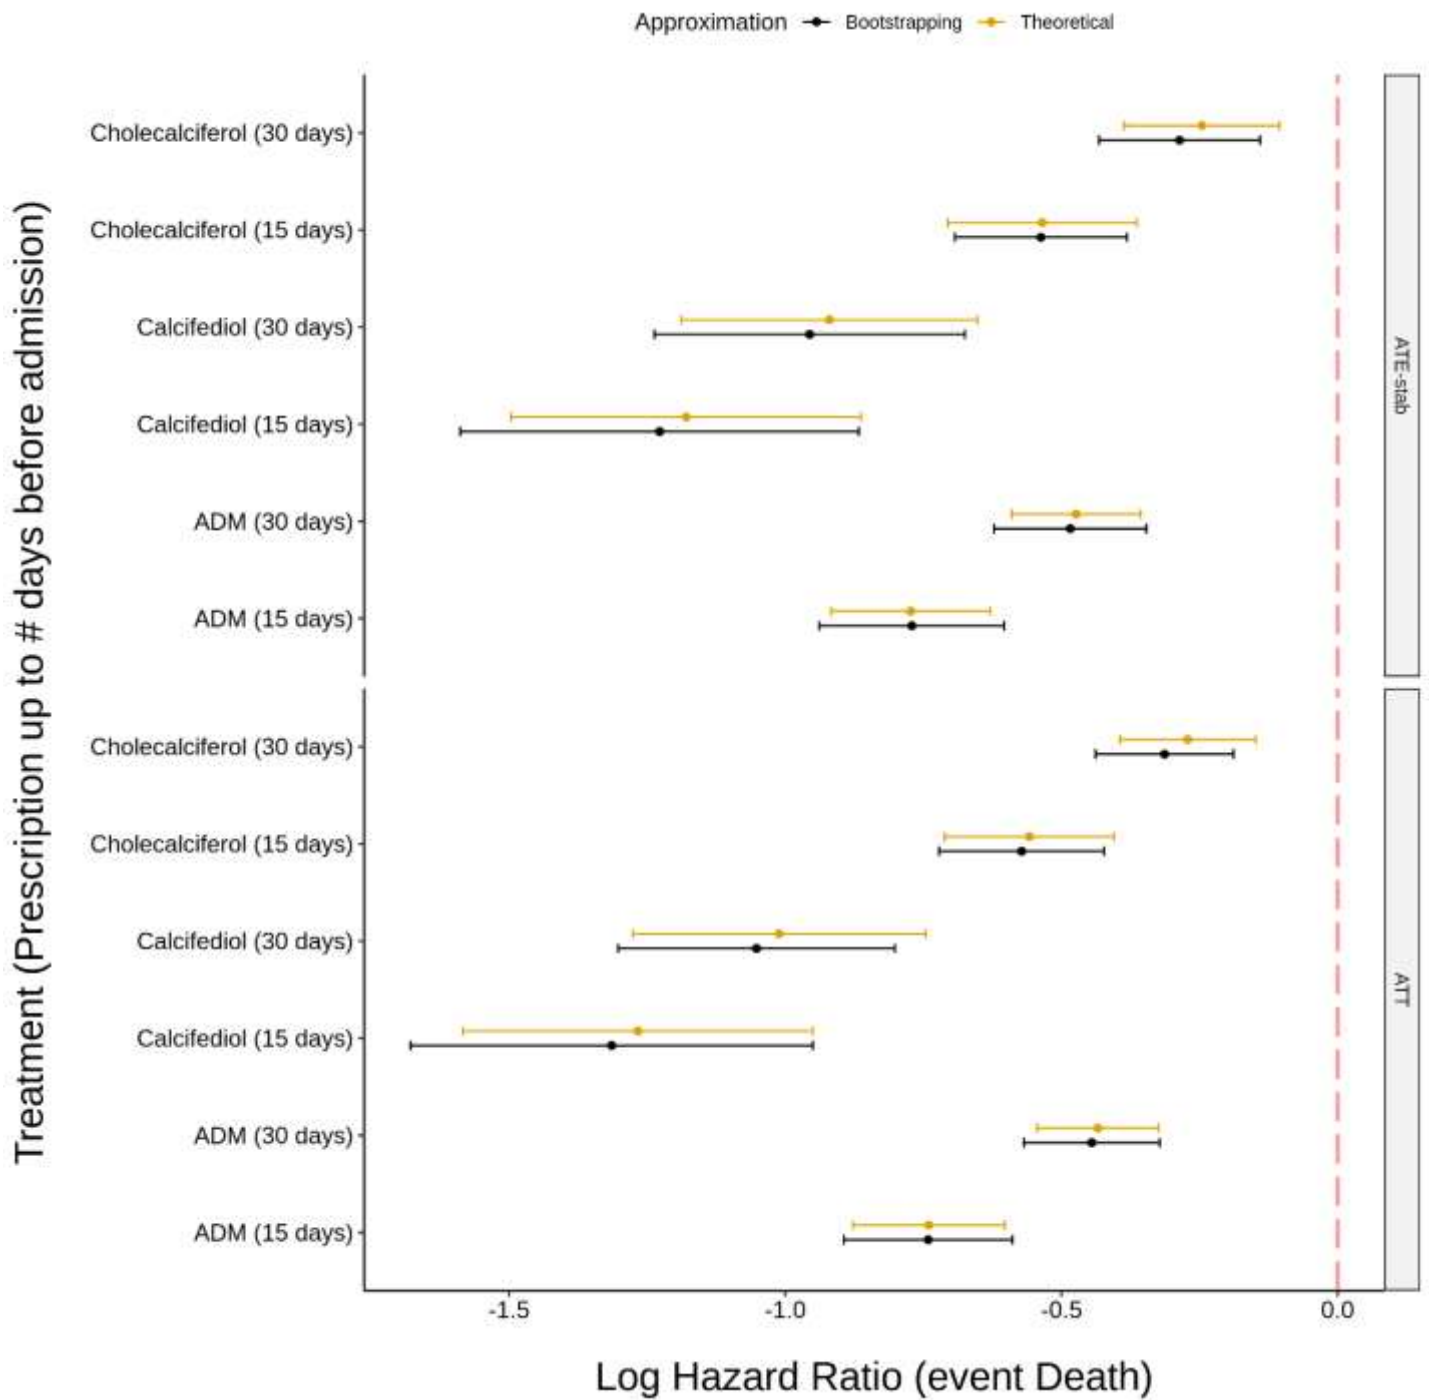

**Supplementary Figure 3.** Bootstrapping (n=10000 iterations) of a Cox model with the propensity weights computed by means of a Binomial General Linear Model (GLM) which regress the treatment as a function of the covariates. The bootstrapping approximates the hazard estimations of the closed form under both estimands: ATE and ATT for outcome: death.
